# Supplementary material
Source: PubMed Central journal article supplement (PMC2680108)

**A**

```

eTG MVRRSTRTRTPSRFGYSARYEPYTVRKASVLVPAAGRNVSTQPLVIEKAKETVKQLKVTVDLCSSEANKKAHHTDAYEVDQLILRRGQVMDMCVTFDR
nTG ----MSTLME•ADET•AGITSP•SPG•----•N•AD•E•AYLGEGRDDTDSPSNP•S•KNF•YELVR•RER•••SE••IKN•FV••••AF•LD•••NK

eTG AYSSAKDTLSLELLMGSRPSVASGSRVPIDLVT-RAPPDDFGLQVSSSGNRVTTKIHLCADALVGEYQLVVCTAQTKEEDEYRYECEGDIILFSPWC
nTG VPKTEVFM•E•TVRGAVVS•INR•TVIRMPFHR•SQ•DT•GGW•IR•G•TE•AKYSLV•NCPS••I•SR•NVA•VIKD•E•AEPYFRQDDP•YV••NA••

eTG KKDDVYMENDKWRKEYVMNENGAYFYGTAS--NIGSSAWYQGQFEEVALECALYLLKKSRRMTRHRSSPVEICRVLSALVNSQDDD-----GVLVGNW
nTG RE•S•H•AG•IEKG•••L•D••YV•I•S•RPGSQHPRP•VF••••DS•T•VVFDD••E•WVRVN•A••D••VVS•KFTH•I•YMPYGVPETKV•L•••••

eTG SGDYS DGVEPTAWNGSISILS QYMKT-ETPVVYQCWVFGSLTTL CRTLGIPCRITITNFESAHDSDANLTL DVHFNEEG-DPLEDLNDDS IWNFHVWDD
nTG ••••EGGES•SK•T••TK•YETFAESGGK••N•••••SGV•C•AM•C•••••SV••••A••••T•VSM•I•TVIDS•TNEEI•Y•SN••V•••••NE

eTG VWFARPDLP EGYGGWQALDSTPQETSHGEFRMPASLKAIKQGHVYLDYDTKFAFSEVNAETVYWTVPKNARHAP--QVITDPKGVGNHISTKAVLADS
nTG •YYS•S•TIP•M••••VV•A••••S•E•V•QC••••PVT•••••LT•IN•••••A••••DRIN•VAT•KD•GP•DMKTVSINTNA••KY••••KLPLVP

eTG -----RQDITEEYKYKEGSSLERIAVYNASRYVAKNKNFRKDIK-QDVEFEVVLADGTMIGKDFSVKVIATNKSSTTRSGSVTLTGSTVFYTGVRK
nTG GGYISRWNA•N•••L••••A••VE••N•ER•IS•GTRPNTY•E•V•TD•I•MAI••DEKISV•S•EL••AVN••••VS•VI•L•MNAHMCY••••LA

eTG TRVYSSRRTFMSRAGESETETFTVEAADIPELTEYAGFTFFIMSSVTQTKQVFSTQKDFVLNKPTLELSITEDLMVGQPMRLSVTFNPLDKAIRNGVF
nTG KKIT•L•KELTVP••K••HVIEMIR•EI•SSC•VDQ•CIK•YVYGK•KE•S•QTVS•DTVY•TP•EMKT---FKV••HEVEAV•E•V••PITLT•CTI

eTG RIEGPDIDGFKADKFRVIQPNETVTHVRLVPKKTGNRRFFANFSSDILIALKGSSTFVAGPSA
nTG TF••ARLLRSMTLYANDVPSKGNFKQK•KFS•REK•K•TLVID•D•KQIGNITDVVEIEIP---
  
```

**B**

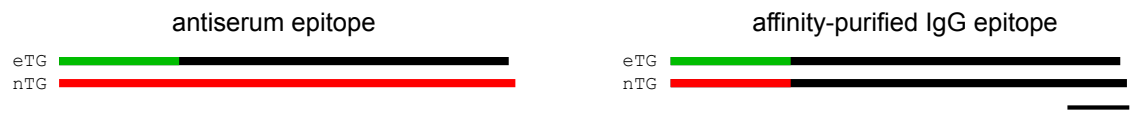

**C**

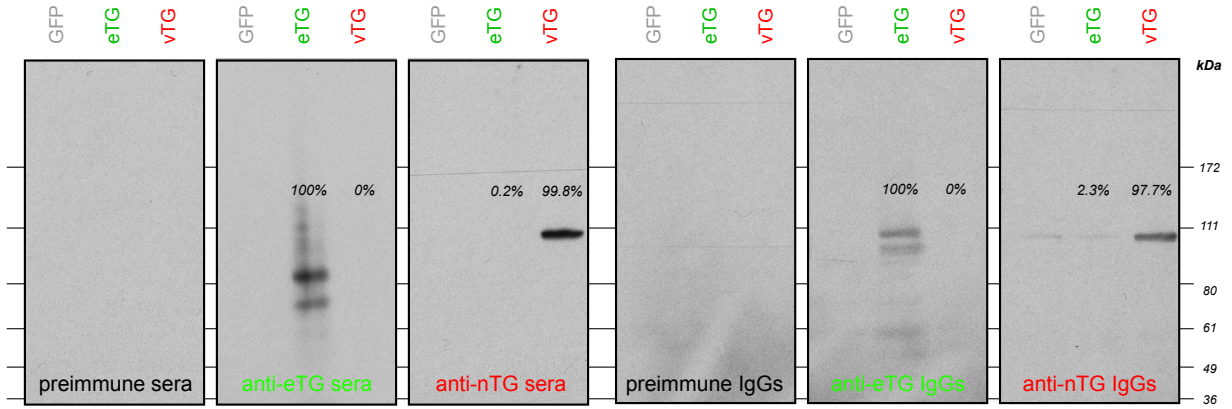

**D In vitro Synthesized Target Fusion Proteins**

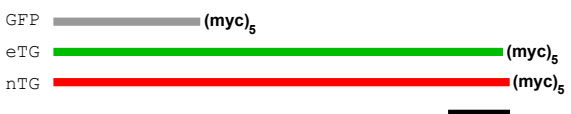

**C'**

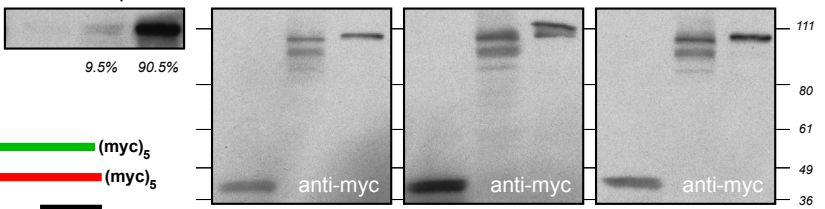

Supplement: supp_136_11_1835__1.pdf [file supp_136_11_1835__1.pdf]
