# Supplementary material
Source: PubMed Central journal article supplement (PMC2680108)
Supplement: supp_136_11_1835__3.pdf [file supp_136_11_1835__3.pdf]

**Sp-SFE9 (frame shifted)**

MEVLIQLLTMLLCSFSLVHCKPVEVEENWKGSPKKQSILQARPMDFRDEIYVSKRNAFGNCIPPPTDVPVGF  
RCATSQECIPLSLVCDGVNDCDYDAYDETEESCK**VVQCDFGLCR**DGACLLTEFVCDGTYDCRDGMDMECS  
LNQCSADDQFQCRSGRCIPHFWRCMDLEDCQAGEDELECEHNCQCGDEFRCDTGACVIRIWWCDGQNDPCN  
AEDETVGCNLVPAVVCDEGLFQCGDQSCIPDYLVCDGNTNCPGGDDEQQECCNADEFRCQTGCQIPEQYRC  
DGLIRDCPAGEDEDCGCGANEFQCDTGTCTIPDIQRNNQIDCDDGSDEASCPIDRVCITVGTVQCTYGHV  
CAVLNCNGVRECPVNGEDEIGCPLTNCQPSEFECTNGQCLPASDKCDGYPRCSGGEDEIGCQLSNQCPSEFE  
CGNGQCLPASDKCDGYPRCSGGEDEIGCRLTNCQPSEFCGNGQCLPASDKCDGYPHCSGGEDEIGCQLSN  
CQLSEFECANGQCLPASDKCDGYPHCTGGEDEIGCQLTNCQPSEFECCKGKCI PASDKCDGYPHCSGGEDE  
TDCSLSNTSPVECGPPLTFECPDGTCTISSDLLCNGQPDPCPYSDADEQPGNCRIIISACSPNQFECDDGSCIY  
SGLVCNDRDDCPDQSDAVERCGFNLCSNEDGFRCQDGSCLPLYQVCNDVLDSCNGEDEDNCVSTYTRPGI  
CPPQNTAYGGNNDPGVCVDNCFQDTCPEPMKCCAAPSECGLTCTQVFLPANPLTGLTELNLIEILQDD  
LNIINNEVAI LADDVGGIETFR**LGALETDSQLLR**QDVDIILKQOANENNO

**published**[PYAPQEVQPYEPEAVQPYAPQEVQPYEPEAVQPYAPQEVQPYEPEAVQPYDRKKSNNHMNQK  
LFNRTRNHKMSDRTRNRKMFDRPNHKMSDRMNRKMSDRPNHKMSDRTRNRKMSDRPNHKMSDRTRNHKMSDRPNH  
KMSDRTRNHKMSDRPNHKMSDHTNRKMSDRPNHKMSDRTRNRKMSDRPNHKMSDRTRNHKMSGRTRNRKMSDRPT  
HKMSDRTRNHKMSDRPNHKMSDRTRNHKMSDRPNHKMSDRTRNRKMSDRPNHKMSDRTRNRKMSDRTRNHKMSDLT  
NHKMSDLTRNHKMSDRFVPPRRSGLTKRIMPDLNHHKTSNLQNTGCLTLPNHRTLGPKIHTLPDLKRRFLWV  
FANIKKI

**predicted**[PYAPQEVQPYEPEAVQPYAPQEVQPYEPEAVQPYAPQEVQPYEPEAVQPYEPQDVRPYEPQ  
NVRPYEPQDVRPPEPQNVRPYEPQDVRPPEPQNVRPYEPQDVRPPEPQNVRPYEPQDVRPPEPQNVRPYEP  
QDVRPPEPQNVRPYEPQDVRPPEPQNVRPYEPQDVRPPEPQNVRPYEPQNVRPYEPQDVRPPEPQNVRPYEP  
QDVRPPEPQNVRPYEPQDVRPPEPQNVRPYEPQDVRPPEPQNVRPYEPQDVRPPEPQNVRPYEPQDVRPPEPQNVRPY  
ETHNARP

**Sp-rendezvin<sup>60</sup>**

MWNRISGHALWLCQHVLLVLLVLLGCCHLPSVESDPTLTHRWAYTYGECSTCGGGTQILVKSCYTLATNS  
QPSQTAPISYCSGLDHPPEPTVRSCTQPCMTCDRTYTALSGALSSPYWPKSSIPRYCRLVIDIPEPKRI  
LLAFHEFTLEGIDLFSPTKTEEDVCLCGVLVEIRDDGGRMNRVCGTKKPFPAWVSETDVTLEFITPYSLVF  
NRFLASYYTTIDTKPSCYRFIDLTLGLHTGLEADGITTEVPLPQKGLHSLNFPNAYPDNQNCEYVLHGNPEHR  
IVLYFDEFELEPGPACEADYVKIEDFYRRSNVYCGKHHFSWISDSNEVWITFRSNANQVYTGFLLAYEL  
MDREGNETIALEESGFFVSPGYPLIYESDASAEYAIRTDPSKLLVVVTFHDFQLERDDYPAPLPVENLPLE  
PDIMIK

**Sp-rendezvin<sup>90</sup>**

RSTLNEHQNHYGDDYGECDVYVKIIDIFDNHVETCYGRIPVFSYISRGNEILVQFKTDLNMNRYRGNASYR  
SISRRTPNWELVYRVAKGGETEALDKFLNQDRGYSESDPNARGTTITRSLATFKDSDVPNWADIGIRKVK  
VDAYK**SGSIIATFR**FDGQGTSLSNWFSCFKMTYSGYDDLNSKDCGGLVFGLTGLTPEFEITTTIAEAATCD  
NDMEHRVWLDVQDVAVDGDCITYEPEIDINSIIFVSSATTGGETATGANIAEADVFTIIVQKDCDERISPS  
RDSVPNIASKGHDELAYSNNCYCDLYLSVHPFDRLAIEFTDFELEDEDECLANDYVQIENIETAFQIFCGV  
QHVVVWATANAAILRFRTRDSVVTYNGWAGASVRAERRNLEDSTVTVNPTGNVTPDYPNSLQDYRYACE  
FIVHAHPEDRVIFFSR**FIFETENPPELQIDPR**STRSNFIDVSGRLYPFSWTSDTNELALIHAPLPYRTY  
IFFEGDYRTLEAPRPATCQRFADADLGGTFSWPTESLSTGLQNCYVIVRSDPVEHRRVQIIFDNLKMPQSD  
CNSYINTLDTTTRRNDMYCQIRIRIPFAWTSANEVVIKFFHGPTFALHQVNVLYRSRARVRPEDAKVLTAL  
TGGDFSSPNYPQYDSQSKEYLLHAPAEHLVIVVFKDFSVEGAIEPSPLEPVLRRPARSVEDLSAHYKHM  
YKRQTIIVEPPTPECR**YDYVSVEDVLVNTETK**YCGDQQPF**GVATQGNEALVFLTDETEKR**GFSALYAFEP  
RPAISD

**Sp-rendezvin<sup>120</sup>**

RSTLNEHQNHYGDDYGECDVYVKIIDIFDNHVETCYGRIPVFSYISRGNEILVQFKTDLNMNRYRGNASYR  
SISRRTPNWELVYRVAKGGETEALDKFLNQDRGYSESDPNARGTTITRSLDTFKDSDVPNWADIGIRKVK  
VDAYK**SGSIIATFR**FDGQGTSLSNWFSCFKMTYSGYDDLNSKDCGGLVFGLTGLTPEFEITTTIAEAATCD  
NDMEHRVWLDVQDVAVDGDCITYEPEIDINSIIFVSSATTGGETATGANIAEADVFTIIVQKDCDERISPS  
RDSVPNIASKGHDELAYSNNCYCDLYLSVHPFDRLAIEFTDFELEDEDECLANDYVQIENIETAFQIFCGV
