# Supplementary material
Source: PubMed Central journal article supplement (PMC2680108)

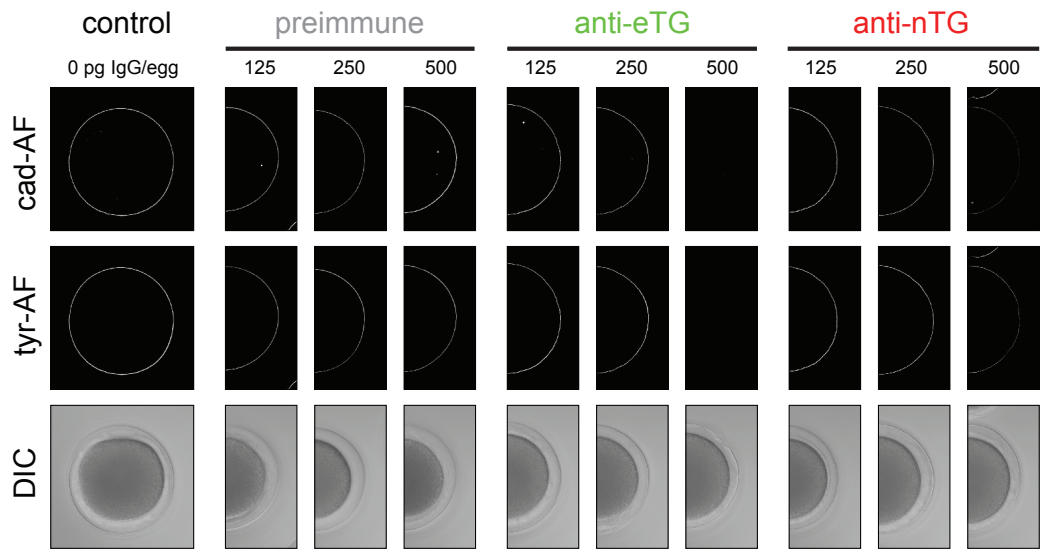

Supplement: supp_136_11_1835__2.pdf [file supp_136_11_1835__2.pdf]

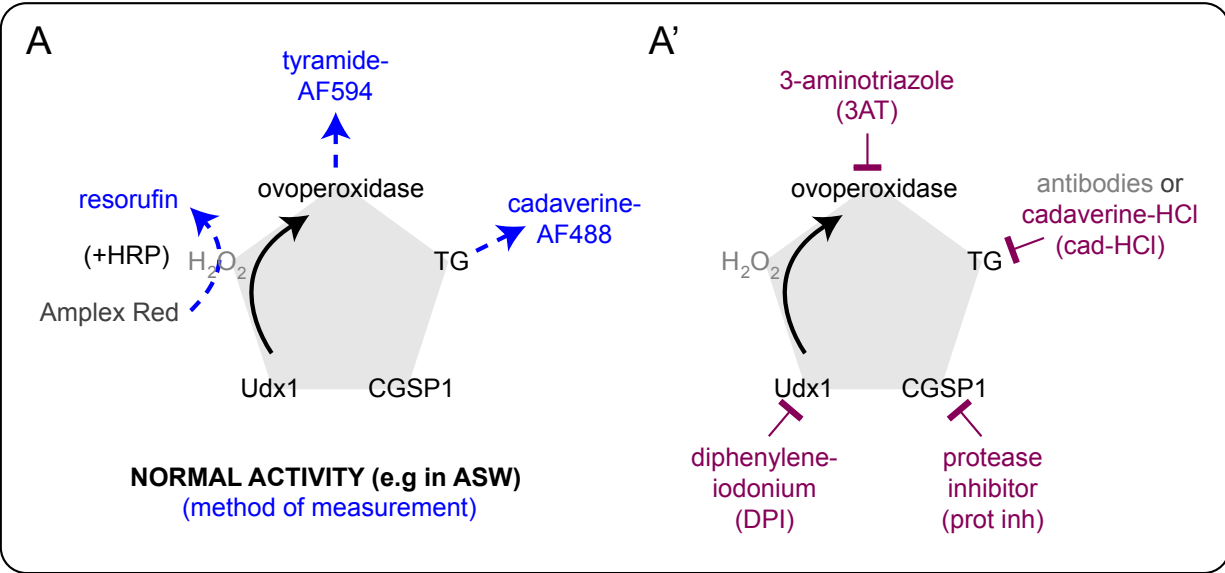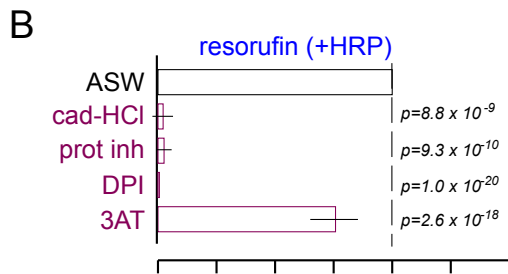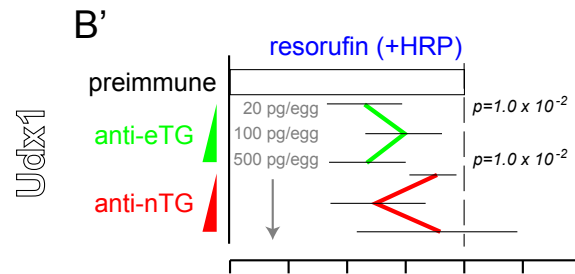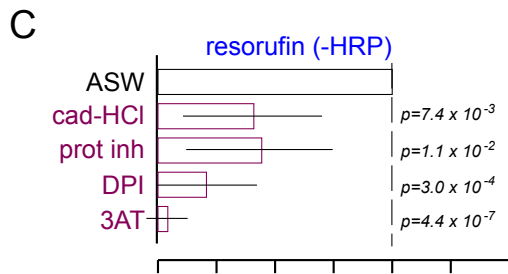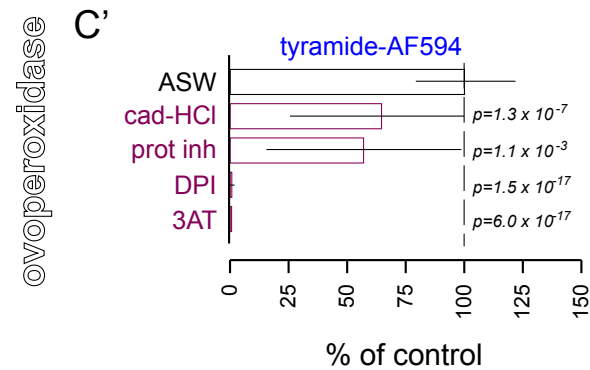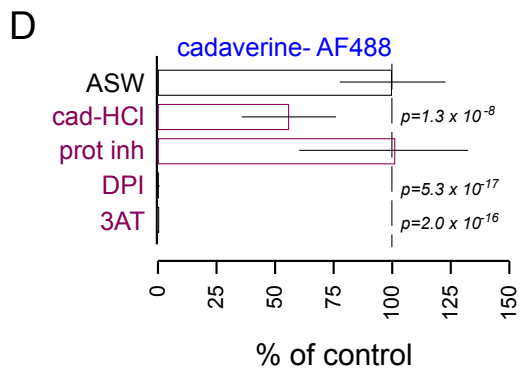

Supplement: supp_136_11_1835__4.pdf [file supp_136_11_1835__4.pdf]
